# Supplementary material for: Integrated Workflow for the Label-Free Isolation and Genomic Analysis of Single Circulating Tumor Cells in Pancreatic Cancer
Source: MDPI journal article supplement (doi:10.3390/ijms23147852), 2022-07-16
Supplement: s1 [file s1]

|                 | DAPI | CellMask<br>orange | CellTracker<br>Green | Brightfield | Combined |
|-----------------|------|--------------------|----------------------|-------------|----------|
| CTC cell line 1 |      |                    |                      |             |          |
| CTC cell line 2 |      |                    |                      |             |          |

**Supplementary Figure S1:** Staining of the pancreatic patient derived CTC cell lines on the DEPArray. Each cell line was fluorescently stained and loaded into a DEPArray cartridge. The unique fluorescent dye allowed for each cell type to be identified and multiple cell lines to be pooled and multiplexed, reducing time and necessary reagents.

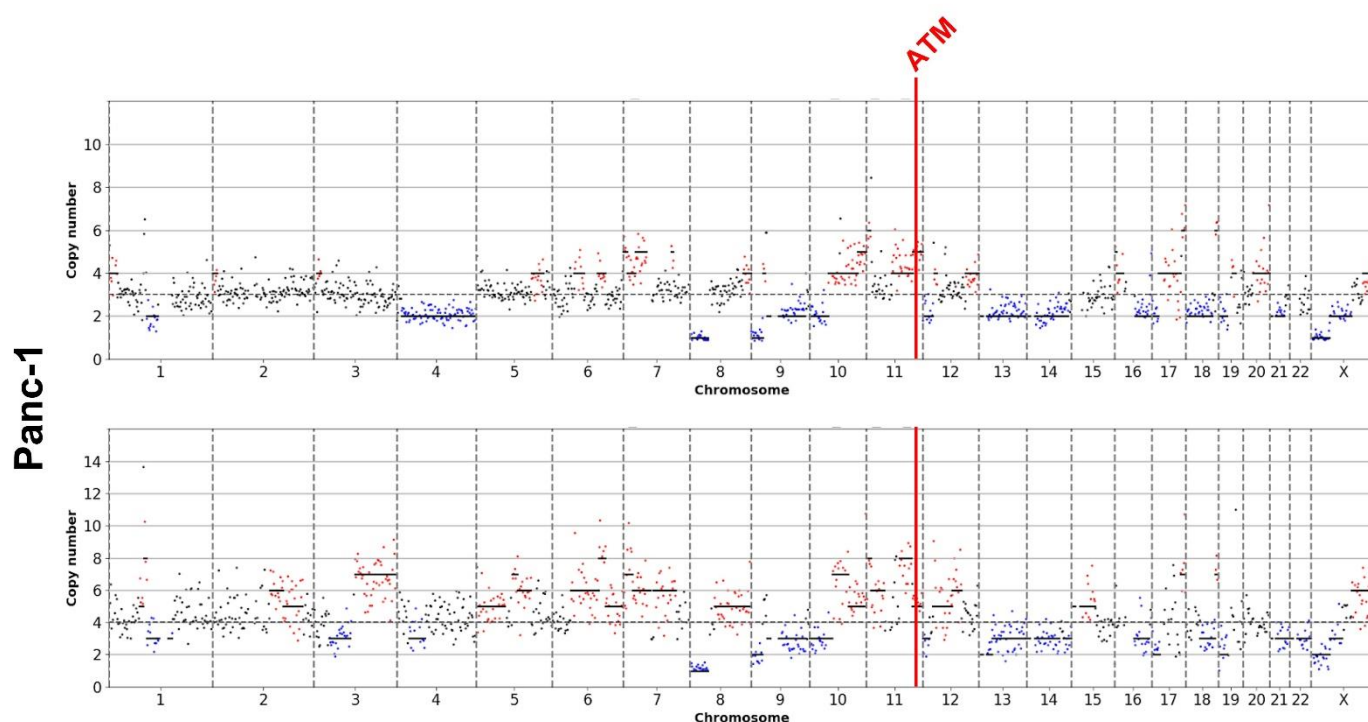

**Supplementary Figure S2:** Single cell copy number variation profiles of Panc-1 cells. Each graph represents an individual cell. Regions and genes highlighted in red experienced gains while regions and genes in blue experienced losses. Regions in black are neutral and center around the ploidy. Specific genes highlighted appeared across all individual cells ( $n=2$ ) and have been noted in reference datasets.

**Supplementary Table S1.** Patient characteristics

| Age | Gender | Race      | Ethnicity    | Cancer                              | Stage | Treatment                      |
|-----|--------|-----------|--------------|-------------------------------------|-------|--------------------------------|
| 53  | Female | Caucasian | Non-Hispanic | Pancreatic Ductal<br>Adenocarcinoma | IV    | Chemotherapy<br>(Folfinirinox) |

**Supplementary Table S2.** Quality control values for cells submitted to sequencing. Number of WGA bands and concentration were determined after whole genome amplification, average fragment size was determined after library preparation and the number of mapped reads, DLRS and R50 were determined after sequencing. Values highlighted in red were below thresholds and the corresponding cells were discarded from further analysis.

| Sample          | # of WGA bands | Concentration (ng/μl) | Average fragment size (bp) | Mapped reads | DLRS  | R50 |
|-----------------|----------------|-----------------------|----------------------------|--------------|-------|-----|
| BxPC3           | 2              | 14.3                  | 517                        | 462,300      | 0.276 | 44  |
|                 | 2              | 10.5                  | 483                        | 655,500      | 0.383 | 31  |
|                 | 2              | 21.8                  | 492                        | 726,400      | 0.278 | 44  |
| Capan-2         | 4              | 10.7                  | 508                        | 397,900      | 0.235 | 45  |
|                 | 4              | 12.4                  | 538                        | 584,200      | 0.245 | 44  |
| Panc-1          | 4              | 8.48                  | 786                        | 451,200      | 0.321 | 41  |
|                 | 3              | 26.2                  | 729                        | 382,200      | 0.282 | 42  |
|                 | 3              | 41.6                  | 786                        | 505,400      | 0.554 | 43  |
| CTC cell line 1 | 3              | 49.8                  | 1035                       | 204,100      | 0.237 | 46  |
|                 | 4              | 41.2                  | 1059                       | <200,000     | --    | --  |
|                 | 2              | 5.44                  | 575                        | 529,600      | 0.294 | 38  |
| CTC cell line 2 | 3              | 41.6                  | 1080                       | 203,300      | 0.228 | 46  |
|                 | 4              | 50.8                  | 1043                       | 202,500      | 0.278 | 47  |
|                 | 4              | 31.6                  | 813                        | <200,000     | --    | --  |
| CTC             | 2              | 19.6                  | 482                        | 651,400      | 0.217 | 47  |
| WBC             | 2              | 9.26                  | 532                        | 609,600      | 0.23  | 45  |

**Supplementary Table S3:** Cancer related genes identified by in regions of gains or loss of the patient derived CTC cell lines. Cancer related genes were identified by MSBiosuite. For each gene the following information is given: chromosome location, identification as either an oncogene or tumor suppressor gene, CNV gain or loss, number of CTC cell line 1 cells the variation was found in and number of CTC cell line 2 cells the variation was found in (max n=2 for each cell line).

| Chromosome | Chromosome Location | Gene     | Oncogenes/<br>Tumor Suppressor | Gain/ Loss | CTC cell line 1 | CTC cell line 2 |
|------------|---------------------|----------|--------------------------------|------------|-----------------|-----------------|
| 1          | 1p36.32             | TNFRSF14 | Tumor Suppressor               | Gain       | 1               | --              |
|            | 1p36.31             | RPL22    | Oncogene                       | Gain       | --              | 1               |
|            | 1p36.22             | PIK3CD   | Oncogene                       | Gain       | --              | 1               |
|            | 1p36.22             | MTOR     | Oncogene                       | Gain       | --              | 1               |
|            | 1p36.12             | EIF4G3   | Oncogene                       | Gain       | --              | 1               |
|            | 1p36.13             | SDHB     | Tumor Suppressor               | Gain       | 1               | 1               |
|            | 1q31.2              | B3GALT2  | Tumor Suppressor               | Gain       | 1               | --              |
|            | 1q31.3              | ASPM     | Oncogene                       | Gain       | 1               | --              |
|            | 1q31.3-q32.1        | PTPRC    | Oncogene                       | Gain       | 1               | --              |
|            | 1q43                | OPN3     | Tumor Suppressor               | Gain       | --              | 1               |
| 2          | 2q32.2              | ORMDL1   | Tumor Suppressor               | Gain       | 1               | --              |
|            | 2q36.1              | ACSL3    | Oncogene                       | Gain       | 1               | --              |
|            | 2q36.2              | CUL3     | Tumor Suppressor               | Gain       | 1               | --              |
| 3          | 3p26.2              | CRBN     | Tumor Suppressor               | Gain       | --              | 1               |
|            | 3p26.2              | CRBN     | Tumor Suppressor               | Loss       | 1               | --              |
|            | 3p25.3              | FANCD2   | Tumor Suppressor               | Gain       | --              | 1               |
|            | 3p25.3              | VHL      | Tumor Suppressor               | Gain       | --              | 1               |

|   |              |         |                  |      |    |    |
|---|--------------|---------|------------------|------|----|----|
|   | 3p25.3       | SRGAP3  | Oncogene         | Gain | -- | 1  |
|   | 3p25.2       | PPARG   | Oncogene         | Gain | -- | 1  |
|   | 3p25.2       | MKRN2   | Oncogene         | Gain | -- | 1  |
|   | 3p25.1       | XPC     | Tumor Suppressor | Gain | -- | 1  |
|   | 3p24.1       | TGFBR2  | Tumor Suppressor | Gain | -- | 1  |
|   | 3p21.31      | RHOA    | Oncogene         | Gain | -- | 1  |
|   | 3p21.31      | SETD2   | Tumor Suppressor | Gain | -- | 1  |
|   | 3p21.31      | RBM5    | Tumor Suppressor | Gain | -- | 1  |
|   | 3p22.3       | CLASP2  | Tumor Suppressor | Gain | -- | 1  |
|   | 3p22.2       | MLH1    | Tumor Suppressor | Gain | -- | 1  |
|   | 3p22.2       | ITGA9   | Oncogene         | Gain | -- | 1  |
|   | 3p22.2       | MYD88   | Oncogene         | Gain | -- | 1  |
|   | 3p22.1       | CTNNB1  | Oncogene         | Gain | -- | 1  |
|   | 3p21.1       | BAP1    | Tumor Suppressor | Gain | -- | 1  |
|   | 3p21.1       | PBRM1   | Tumor Suppressor | Gain | -- | 1  |
|   | 3p14.3       | WNT5A   | Oncogene         | Gain | -- | 1  |
|   | 3p13         | MITF    | Oncogene         | Gain | -- | 1  |
|   | 3p13         | FOXP1   | Oncogene         | Gain | -- | 1  |
| 4 | 4q31.21      | INPP4B  | Tumor Suppressor | Gain | 1  | -- |
| 5 | 5p15.33      | SDHA    | Tumor Suppressor | Gain | 1  | -- |
|   | 5p15.33      | TERT    | Oncogene         | Gain | 1  | -- |
| 6 | 6q13         | EEF1A1  | Tumor Suppressor | Loss | -- | 1  |
|   | 6q14.3       | ZNF292  | Tumor Suppressor | Loss | -- | 1  |
|   | 6q21         | PRDM1   | Tumor Suppressor | Gain | -- | 1  |
|   | 6q21         | HDAC2   | Tumor Suppressor | Gain | -- | 1  |
|   | 6p21.1       | TFEB    | Oncogene         | Gain | 1  | -- |
|   | 6p21.1       | CCND3   | Oncogene         | Gain | 1  | -- |
|   | 6p21.1       | TRERF1  | Oncogene         | Gain | 1  | -- |
|   | 6q22.1       | ROS1    | Oncogene         | Gain | -- | 1  |
|   | 6q23.2       | ARG1    | Tumor Suppressor | Gain | -- | 1  |
|   | 6q23.3       | TNFAIP3 | Tumor Suppressor | Gain | -- | 1  |
|   | 6q23.3       | MYB     | Oncogene         | Gain | -- | 1  |
|   | 6q23.3       | BCLAF1  | Oncogene         | Gain | -- | 1  |
|   | 6q24.1       | ECT2L   | Tumor Suppressor | Gain | -- | 1  |
|   | 6q25.1-q25.2 | ESR1    | Oncogene         | Gain | -- | 1  |
|   | 6q25.3       | ARID1B  | Tumor Suppressor | Gain | -- | 1  |
|   | 6q25.3       | IGF2R   | Tumor Suppressor | Gain | -- | 1  |
|   | 6q26         | MAP3k4  | Oncogene         | Gain | -- | 1  |
| 7 | 7p22.3-p22.2 | GNA12   | Tumor Suppressor | Gain | 1  | -- |
|   | 7p11.2       | EGFR    | Oncogene         | Loss | 1  | -- |
| 8 | 8q13.3       | NCOA2   | Oncogene         | Gain | 2  | 1  |
|   | 8q21.3       | NBN     | Tumor Suppressor | Gain | 2  | 2  |
|   | 8q22.2       | COX6C   | Oncogene         | Gain | 2  | 2  |
|   | 8q24.11      | MIR3610 | Tumor Suppressor | Gain | 2  | 2  |
|   | 8q24.11      | RAD21   | Tumor Suppressor | Gain | 2  | 2  |
|   | 8q24.11      | EXT1    | Tumor Suppressor | Gain | 2  | 2  |

|    |          |          |                  |      |    |    |
|----|----------|----------|------------------|------|----|----|
|    | 8q24.21  | MYC      | Oncogene         | Gain | 2  | 2  |
|    | 8q24.22  | NDRG1    | Oncogene         | Gain | 2  | 2  |
| 9  | 9q34.2   | BRD3     | Oncogene         | Gain | 1  | -- |
| 10 | 10q24.32 | SUFU     | Tumor Suppressor | Gain | 2  | 2  |
|    | 10q25.2  | TCF7L2   | Oncogene         | Gain | 2  | 2  |
|    | 10q25.2  | SNORA87  | Oncogene         | Gain | 2  | 2  |
|    | 10q26.13 | FGFR2    | Oncogene         | Gain | 2  | 2  |
|    | 10q26.3  | MGMT     | Oncogene         | Gain | 2  | 2  |
| 11 | 11p13    | CAT      | Oncogene         | Gain | 1  | -- |
| 12 | 12q21.32 | C12orf29 | Tumor Suppressor | Gain | 1  | -- |
| 13 | 13q34    | IRS2     | Tumor Suppressor | Gain | 1  | -- |
|    | 13q34    | ING1     | Tumor Suppressor | Gain | 1  | -- |
| 17 | 17q21.33 | SPOP     | Oncogene         | Gain | 2  | 2  |
|    | 17q21.33 | COL1A1   | Oncogene         | Gain | 2  | 2  |
|    | 17q22    | HLF      | Oncogene         | Gain | 2  | 2  |
|    | 17q22    | RNF43    | Tumor Suppressor | Gain | 2  | 2  |
|    | 17q22    | RAD51C   | Tumor Suppressor | Gain | 2  | 2  |
|    | 17q22    | MIR142   | Tumor Suppressor | Gain | 2  | 2  |
|    | 17q23.1  | CLTC     | Oncogene         | Gain | 1  | 2  |
|    | 17q23.2  | BRIP1    | Tumor Suppressor | Gain | 1  | 2  |
|    | 17q23.3  | PPM1D    | Tumor Suppressor | Gain | 1  | 2  |
|    | 17q23.3  | CD79B    | Oncogene         | Gain | 2  | 2  |
|    | 17q23.3  | DDX5     | Oncogene         | Gain | 2  | 2  |
|    | 17q23.3  | CEP95    | Oncogene         | Gain | 2  | 2  |
|    | 17q24.1  | GNA13    | Tumor Suppressor | Gain | 1  | 2  |
|    | 17q24.1  | AXIN2    | Tumor Suppressor | Gain | 2  | 2  |
|    | 17q24.2  | ARSG     | Tumor Suppressor | Gain | 2  | 2  |
|    | 17q24.2  | BPTF     | Oncogene         | Gain | 2  | 2  |
|    | 17q24.3  | SOX9     | Tumor Suppressor | Gain | 2  | 2  |
|    | 17q25.1  | MFSD11   | Oncogene         | Gain | 2  | 2  |
|    | 17q25.2  | SRSF2    | Oncogene         | Gain | 2  | 2  |
|    | 17q25.3  | SEPT9    | Oncogene         | Gain | 2  | 2  |
|    | 17q25.3  | CANT1    | Oncogene         | Gain | 2  | 2  |
|    | 17q25.3  | ENDOV    | Oncogene         | Gain | 2  | 2  |
|    | 17q25.3  | ACTG1    | Oncogene         | Gain | 2  | 2  |
|    | 17q25.3  | ASPSCR1  | Oncogene         | Gain | 2  | 2  |
|    | 17q25.3  | RNF213   | Oncogene         | Gain | -- | 2  |
|    | 17q25.3  | B3GNTL1  | Tumor Suppressor | Gain | 1  | -- |
| 20 | 20q13.32 | GNAS     | Oncogene         | Gain | 1  | -- |
|    | 20q13.33 | SS18L1   | Oncogene         | Gain | 1  | -- |
